# Supplementary material for: Heritable Epigenomic Modifications Influence Stress Resilience and Rapid Adaptations in the Brown Planthopper (Nilaparvata lugens)
Source: Int J Mol Sci. 2022 Aug 5;23(15):8728. doi: 10.3390/ijms23158728 (PMC9368798; doi:10.3390/ijms23158728)
Supplement: Supplementary file 1 [file ijms-23-08728-s001.zip]

Archive with 5 entries (5 files):
- Fig_S1.pdf
- Fig_S2.pdf
- Fig_S3.pdf
- Supplementary Table S5.xlsx
- Supplementary Tables S1 to S4, S6 to S8.pdf
