# Supplementary material for: Heritable Epigenomic Modifications Influence Stress Resilience and Rapid Adaptations in the Brown Planthopper (Nilaparvata lugens)
Source: Int J Mol Sci. 2022 Aug 5;23(15):8728. doi: 10.3390/ijms23158728 (PMC9368798; doi:10.3390/ijms23158728)
Supplement: Supplementary file 1 [file ijms-23-08728-s001.zip › Supplementary Table S5.xlsx]

## Sheet: Sheet1
Table S5 Percent methylation of genes across samples in all three contexts.
	BOD_AD			BOD_NY			IG1			IG4			ING1			ING4			IR1			IR2			PI			PR			RG1			RG4			RNG1			RNG4			RT1			RT2			UTUE
	BOD_AD_CG	BOD_AD_CHG	BOD_AD_CHH	BOD_NY_CG	BOD_NY_CHG	BOD_NY_CHH	IG1_CG	IG1_CHG	IG1_CHH	IG4_CG	IG4_CHG	IG4_CHH	ING1_CG	ING1_CHG	ING1_CHH	ING4_CG	ING4_CHG	ING4_CHH	IR1_CG	IR1_CHG	IR1_CHH	IR2_CG	IR2_CHG	IR2_CHH	PI_CG	PI_CHG	PI_CHH	PR_CG	PR_CHG	PR_CHH	RG1_CG	RG1_CHG	RG1_CHH	RG4_CG	RG4_CHG	RG4_CHH	RNG1_CG	RNG1_CHG	RNG1_CHH	RNG4_CG	RNG4_CHG	RNG4_CHH	RT1_CG	RT1_CHG	RT1_CHH	RT2_CG	RT2_CHG	RT2_CHH	CONTROL SET_CG
Genes	CpG	CHG	CHH	CpG	CHG	CHH	CpG	CHG	CHH	CpG	CHG	CHH	CpG	CHG	CHH	CpG	CHG	CHH	CpG	CHG	CHH	CpG	CHG	CHH	CpG	CHG	CHH	CpG	CHG	CHH	CpG	CHG	CHH	CpG	CHG	CHH	CpG	CHG	CHH	CpG	CHG	CHH	CpG	CHG	CHH	CpG	CHG	CHH	CpG
CYP6AY1	80.3	83.2	82.8	95	96.5	96.4	55.6	59.9	59.1	43.4	48.6	47.7	10.4	18.2	16.7	23.4	30.5	29.2	13.9	21.5	19.9	10.2	18	16.6	5.3	13.6	11.7	10.9	18.8	17.1	25.3	32.1	30.7	11.6	19.4	17.6	19.3	26.8	25.4	40.6	53.7	53.5	91.4	93	93.1	90.8	92.9	92.7	99.5
CYP6ER1-CpG1	74.1	78	78.7	46.5	42.7	55.1	70	74.4	79.3	72.7	76	81.6	14.2	0.6	17.7	54.5	52.7	59.2	63.6	67.1	69.5	31.4	15.9	31.3	29.6	14.8	29.4	31.7	20.8	34.5	55.7	56.2	62.4	57.3	56.7	63	72.6	79.9	81.3	74	77.9	83.8	56.6	55.6	63.7	56	55	63.1	89
CYP6ER1-CpG2	85.7	91.7	87.3	81.8	91	87.4	78.9	89.3	85.8	82.5	91.8	88.8	86.7	96.7	91.1	93.3	90.5	86.1	69.7	83.3	86.2	90.4	96.9	91.1	92.4	96.1	9.8	82.9	92.9	89.4	31.4	35.7	26.3	40	44.6	35.3	67.6	63.6	62	38	44.2	36	76.9	87.9	86.1	75.7	87.2	85.8	94
EG	21.7	27.1	21.7	14	19.6	13.2	25.9	31.1	26	33.6	38.5	34.2	6.6	12.8	5.4	20.3	25.9	20.2	6.5	12.5	5.4	6.6	12.6	5.3	6.7	12.8	5.6	6.5	12.7	5.4	6.6	12.8	5.5	6.6	12.8	5.5	6.4	12.7	5.4	6.6	12.7	5.5	8.2	14.3	7.3	8	14.1	7.1	98.6
Est	17.8	14.4	10.6	45.6	35.7	38.3	21.5	10.1	12.2	17.4	1.2	5.1	19.1	16.5	12.5	18.9	15.2	11.1	24.6	19.9	16.2	21.8	14	9.7	19.7	13	8.9	19.6	13.1	9	20.1	1.5	5.4	15.1	0.7	5.1	15.1	0.2	4.9	13.5	0.7	4.6	40.1	30.3	33.3	41.2	31.5	34.4	99.9
Gstm2	99.9	90.9	99.8	99.7	90.7	99.8	99.8	91.1	99.9	99.8	91.2	99.9	99.8	91.8	99.5	99.8	91.6	99.5	99.8	91.6	99.8	99.3	91.4	99	99.4	91.4	99.7	95.3	85.1	97.3	99.5	98	99.7	99.4	97.8	9.6	92.2	7.2	88.1	99.7	91.3	99.3	99.8	91.1	99.8	99.3	91.4	99.1	99.9
InR2	99.9	99.9	100	99.6	99.8	99.8	95	97.3	100	99.9	100	100	99.9	99.9	100	99.9	99.9	99.9	99.8	99.9	99.9	99.8	99.9	99.9	99.8	99.9	99.8	99.8	99.9	99.9	98.9	98.7	98.4	99.4	97.8	99.6	100	96.1	98.3	100	100	99.1	99.8	99.9	99.9	99.8	99.9	99.9	99.9
Rep1	23.2	99.6	93.1	25	98.2	92.2	75	99.6	93.4	N.A.	99.9	99.1	22.5	99.6	92.9	67.6	98	90.6	58.2	89.7	85.9	N.A.	93.1	88.4	N.A.	100	93.2	47.8	99.9	92.8	85.7	99.6	97.8	100	100	95.5	50	100	98.5	50	99.9	93.2	18.2	96.2	91.2	22.2	95.8	91	25
Rep2	99.7	99.9	99.6	27.4	29.2	27	100	100	100	100	100	98.7	99.7	99.9	99.2	90.1	99.8	94.8	100	98.7	98.7	94.9	97.6	96.7	95.7	100	100	100	100	100	99.8	100	98	99.6	99.9	98.4	98.8	100	99.3	95.8	100	97.3	71.4	69.3	64	97.6	99.5	97.5	99.8
[truncated: 2 more columns]
