# Supplementary material for: Heritable Epigenomic Modifications Influence Stress Resilience and Rapid Adaptations in the Brown Planthopper (Nilaparvata lugens)
Source: Int J Mol Sci. 2022 Aug 5;23(15):8728. doi: 10.3390/ijms23158728 (PMC9368798; doi:10.3390/ijms23158728)
Supplement: Supplementary file 1 [file ijms-23-08728-s001.zip › Supplementary Tables S1 to S4, S6 to S8.pdf]

**Table S1** Stress-responsive genes selected for this study, their role and significance for BPH.

| <b>Genes</b>            | <b>NCBI accession</b> | <b>Functional relevance for BPH</b>                                                                           | <b>Reference</b> |
|-------------------------|-----------------------|---------------------------------------------------------------------------------------------------------------|------------------|
| <i>Carboxylesterase</i> | LOC111062288          | Involved in xenobiotic detoxification                                                                         | (69)             |
| <i>CYP6AY1</i>          | LOC111048315          | P450 monooxygenase involved in pesticide degradation                                                          | (70)             |
| <i>CYP6ER1</i>          | LOC111057329          | P450 monooxygenase involved in imidacloprid (pesticide) metabolism                                            | (70, 71)         |
| <i>Gstm2</i>            | LOC111061700          | Involved in xenobiotic detoxification and host adaptation                                                     | (72)             |
| <i>InR2</i>             | LOC111047475          | Regulates wing polyphenisms in BPH response to environmental cues such as population density and host quality | (49)             |
| <i>Endoglucanase</i>    | LOC111056901          | Plant cell wall degrading enzyme; facilitates BPH feeding on rice host                                        | (73)             |

**Table S2** Predicted CpG islands along with their respective amplicon lengths and location.

| <b>Genes</b>            | <b>CpG island<br/>(Amplicon) length</b> | <b>Location of the<br/>CpG island</b> |
|-------------------------|-----------------------------------------|---------------------------------------|
| <i>Carboxylesterase</i> | 278 bp                                  | Exonic                                |
| <i>CYP6AY1</i>          | 297 bp                                  | Exonic                                |
| <i>CYP6ER1-CpG1</i>     | 299 bp                                  | Exonic                                |
| <i>CYP6ER1-CpG2</i>     | 293 bp                                  | Exonic                                |
| <i>Gstm2</i>            | 226 bp                                  | Exonic                                |
| <i>InR2</i>             | 337 bp                                  | Intronic                              |
| <i>Endoglucanase</i>    | 300 bp                                  | Intronic                              |

**Table S3** Description of BPH populations analyzed in the present study.

| <b>Samples</b> | <b>Description</b>                                               |
|----------------|------------------------------------------------------------------|
| BOD_AD         | BOD adults (Control)                                             |
| BOD_NY         | BOD nymphs (Control)                                             |
| PI             | Parental imidacloprid                                            |
| IG1            | 1st generation BPH adults under Imidacloprid stress              |
| IG4            | 4th generation BPH adults under Imidacloprid stress              |
| ING1           | 1st generation BPH nymphs under Imidacloprid stress              |
| ING4           | 4th generation BPH nymphs under Imidacloprid stress              |
| PR             | Parental Rathu Heenati (RH)                                      |
| RG1            | 1st generation BPH adults feeding on RH plants                   |
| RG4            | 4th generation BPH adults feeding on RH plants                   |
| RNG1           | 1st generation BPH nymphs feeding on RH plants                   |
| RNG4           | 4th generation BPH nymphs feeding on RH plants                   |
| IR1            | 1st generation reversal population after Imidacloprid withdrawal |
| IR2            | 2nd generation reversal population after Imidacloprid withdrawal |
| RT1            | 1st generation reversal population after RH exposure             |
| RT2            | 2nd generation reversal population after RH exposure             |
| UTUE           | Untreated and Unexposed to stress (Control)                      |

**Table S4** Total reads generated on Illumina Miseq System and their mapping efficiency

| <b>Samples</b> | <b>Total reads</b> | <b>Filtered reads</b> | <b>&gt;Q30 reads</b> | <b>Mapped reads</b> | <b>Mapping efficiency</b> |
|----------------|--------------------|-----------------------|----------------------|---------------------|---------------------------|
| <b>BOD_AD</b>  | 551992             | 551166                | 99.85036015          | 475274              | 86.23064558               |
| <b>BOD_NY</b>  | 544646             | 438826                | 80.57086621          | 348394              | 79.3922876                |
| <b>PR</b>      | 556836             | 408648                | 73.3874965           | 179630              | 43.95714649               |
| <b>RG1</b>     | 679769             | 581712                | 85.57495267          | 520887              | 89.54379487               |
| <b>RG4</b>     | 590407             | 571952                | 96.87419018          | 399789              | 69.89904747               |
| <b>RNG1</b>    | 550493             | 546696                | 99.31025463          | 538704              | 98.53812722               |
| <b>RNG4</b>    | 673390             | 594782                | 88.32652698          | 544694              | 91.57876331               |
| <b>RT1</b>     | 634404             | 574902                | 90.62080315          | 436858              | 75.98825539               |
| <b>RT2</b>     | 624645             | 574576                | 91.98440714          | 546889              | 95.18131631               |
| <b>PI</b>      | 431102             | 427436                | 99.1496212           | 137644              | 32.20224782               |
| <b>IG1</b>     | 680448             | 556398                | 81.76936371          | 410873              | 73.8451612                |
| <b>IG4</b>     | 544224             | 513544                | 94.36261539          | 453702              | 88.3472497                |
| <b>ING1</b>    | 509262             | 433198                | 85.06387675          | 386090              | 89.1255269                |
| <b>ING4</b>    | 618125             | 590592                | 95.54572295          | 385532              | 65.27890659               |
| <b>IR1</b>     | 592018             | 546289                | 92.27574162          | 167694              | 30.6969388                |
| <b>IR2</b>     | 326286             | 326186                | 99.96935204          | 81202               | 24.88675579               |

**Table S5** Percent methylation of genes across samples in all three contexts.

Table S5 is a large table that extends beyond the width of the page and is provided as a separate file in spreadsheet format (**Table S5.xlsx**).

**Table S6** Methylation sensitive restriction analysis.

| <b>Tested<br/>Regions/<br/>Amplicons</b> | <b>BOD1</b>                    |       |     | <b>BOD2</b> |      |     | <b>Aza-1</b> |      |     | <b>Aza-2</b> |      |     |
|------------------------------------------|--------------------------------|-------|-----|-------------|------|-----|--------------|------|-----|--------------|------|-----|
|                                          | S                              | IS    | C   | S           | IS   | C   | S            | IS   | C   | S            | IS   | C   |
| <i>Gstm2</i>                             | 20.6                           | 21.37 | 100 | 15.4        | 17.9 | 100 | 11.5         | 1.2  | 100 | 17.17        | 0.0  | 100 |
| <i>CYP6ER1</i>                           | NO SIGNIFICANT CHANGE OBSERVED |       |     |             |      |     |              |      |     |              |      |     |
| <i>EG</i>                                | 81.6                           | 62.2  | 100 | 76          | 79.5 | 100 | 97.1         | 51.5 | 100 | 59.57        | 63.3 | 100 |
| <i>CYP6AY1</i>                           | NA                             | 11.4  | 100 | 69.5        | NA   | 100 | 5            | NA   | 100 | NA           | NA   | 100 |
| <i>Est</i>                               | 39.53                          | 34.3  | 100 | 100         | NA   | 100 | 18.0         | 89.3 | 100 | 27.21        | 19.5 | 100 |

NA: Data not available (poor amplification); S: Methylation sensitive restriction enzyme; IS: Methylation insensitive restriction enzyme; C: Control (Uncut)

**Table S7** Primers used for bisulfite PCRs performed in this study.

| Primer Name    | Primer Sequence (5' – 3')  |
|----------------|----------------------------|
| CYP6ER1-CpG1 F | GATTATGCATTATTGTGATTACTACA |
| CYP6ER1-CpG1 R | ACAACGTCTTATAAATTGGTTT     |
| CYP6ER1-CpG2 F | GGCACTGCTACTTCAATCCT       |
| CYP6ER1-CpG2 R | GGAGGTCTCACTAGATTAAAGTTCT  |
| CYP6AY1-F      | GAGTGGATGTAACTTTGTTGTAGAG  |
| CYP6AY1-R      | TTACTGTCTGGAAGAACRTAGCTATC |
| EG-F           | TGATATTGATGCGATGAGATTAT    |
| EG-R           | TTGAAACAACAGGTATTCTTT      |
| Est-1F         | TTCGCAAGTTTGGATGATG        |
| Est-1R         | CTAACCTCCCTCCATTTCTCT      |
| InR2-F         | TGTCGCTGTCGGAGATGGG        |
| InR2-R         | CCTCAAAGTTCCAAACAAAATAAT   |
| Gstm2-F        | ACCTGAACGACCTTGAAAA        |
| Gstm2-R        | AGTACAACCTTGCAAGGCCA       |
| Rep1-F         | GCCAACTGAACATACCTAC        |
| Rep1-R         | ATAAAATGCACACATACCTTA      |
| Rep2-F         | TGCTCAGCCCCTCATTCA         |
| Rep2-R         | AGGATGACGACACCATTGCT       |

**Table S8** PCR primers for qRT-PCRs.

| Primer Name | Primer Sequence (5' – 3') |
|-------------|---------------------------|
| QCYP6AY1 F  | GCTGTTTCACTTCTTGAGACTCCG  |
| QCYP6AY1 R  | GCTTGAGCTGCTATAACACTCTCTG |
| QCYP6ER1 F  | ATTCCGGTCTATGCGCTTC       |
| QCYP6ER1 R  | TGGATTGGCGCTCTCTTACT      |
| QNIIIp2-F   | TTCTCAGCCGCTCTAGCAAT      |
| QNIIIp2-R   | CAGACGAAGGATCAGGGAAG      |
| QNIEG1 F    | ATGATAGAGGGCTGAAGGGTG     |
| QNIEG1 R    | TAGTAATGTCGTGGTGCTGGC     |
| QEst mod F  | GATTCCTCGGGTTCGCAAGT      |
| QEst mod R  | ACCTTGACTTTGCGGCGATAG     |
